# Supplementary material
Source: ML conference proceedings conference paper supplement (https://openreview.net/forum?id=dXqqFte3KT)
Supplement: supplementary_material [file temp_title.pdf › less_is_more_supplementary_material/Topo_LLM/topollm/model_inference/perplexity/saved_perplexity_processing/align_and_analyse/temp_title.pdf]

Model: model-roberta-base\_task-masked\_lm\_one-year-of-tsla-on-reddit-train-10000-ner, Checkpoint: 2800■Path: /Users/ruppik/git-source/Topo\_LL
